# Supplementary figures and images for: On the Therapeutic Potential of ERK4 in Triple-Negative Breast Cancer
Source: MDPI journal article supplement (doi:10.3390/cancers15010025), 2022-12-21

1C

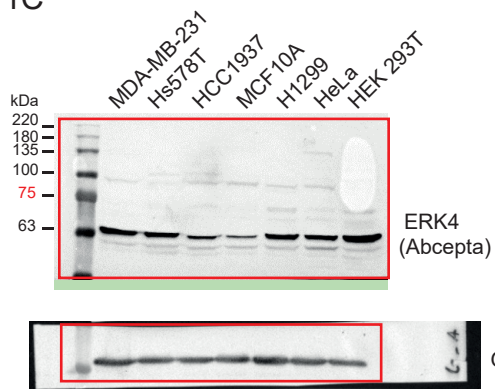

1D

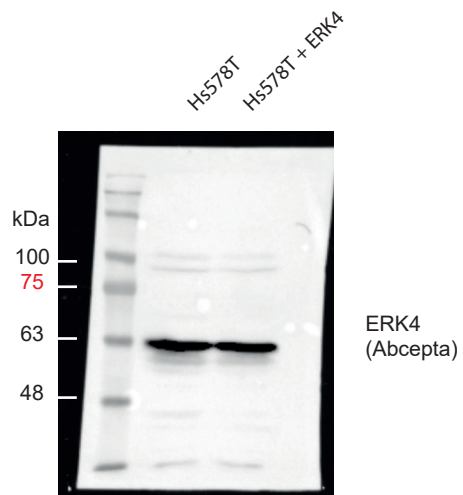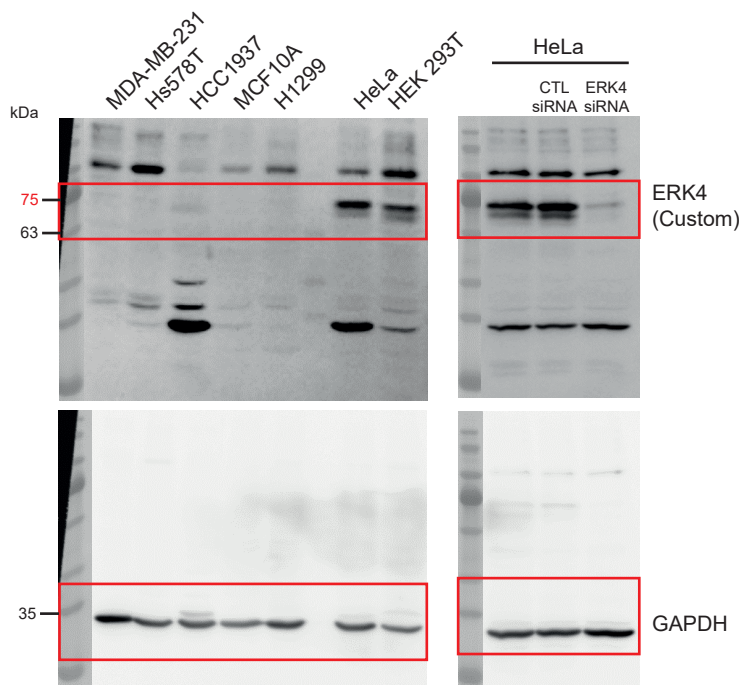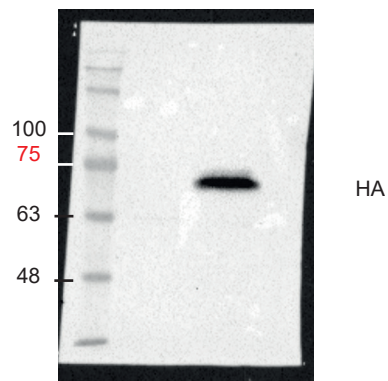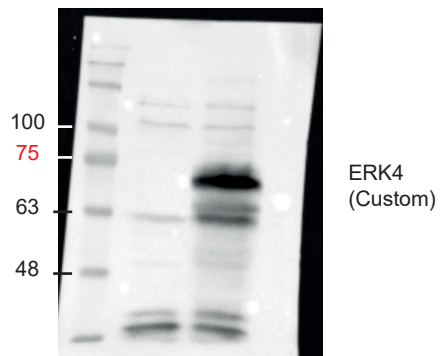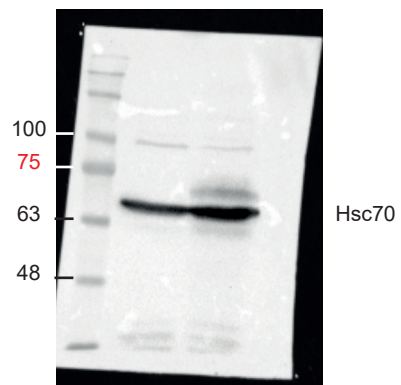

1E

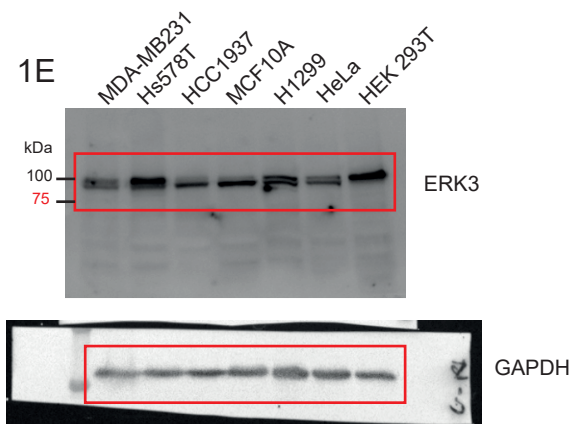

2B

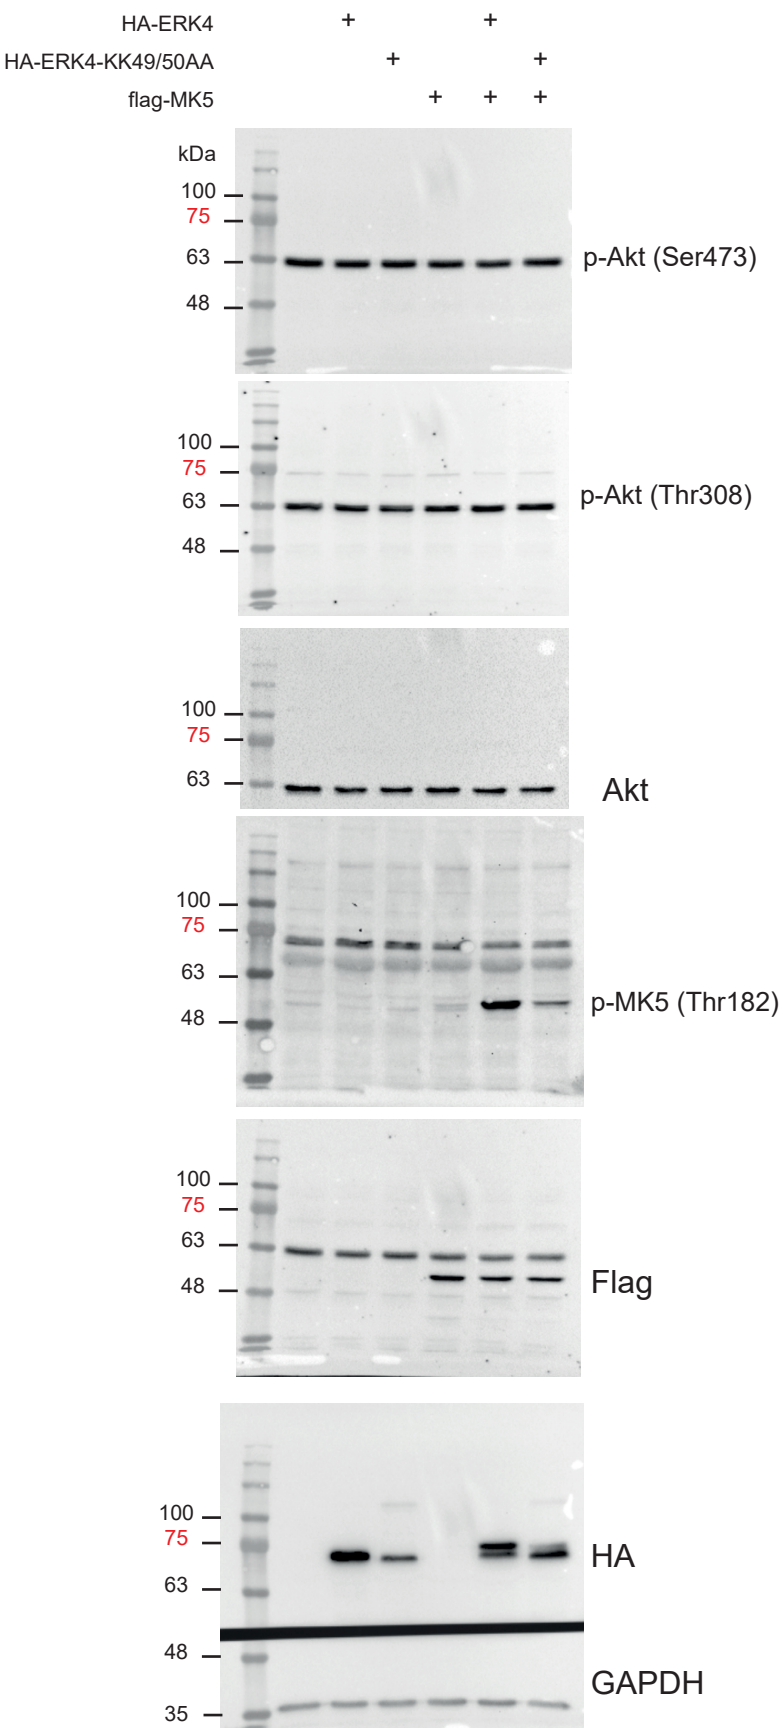

2C

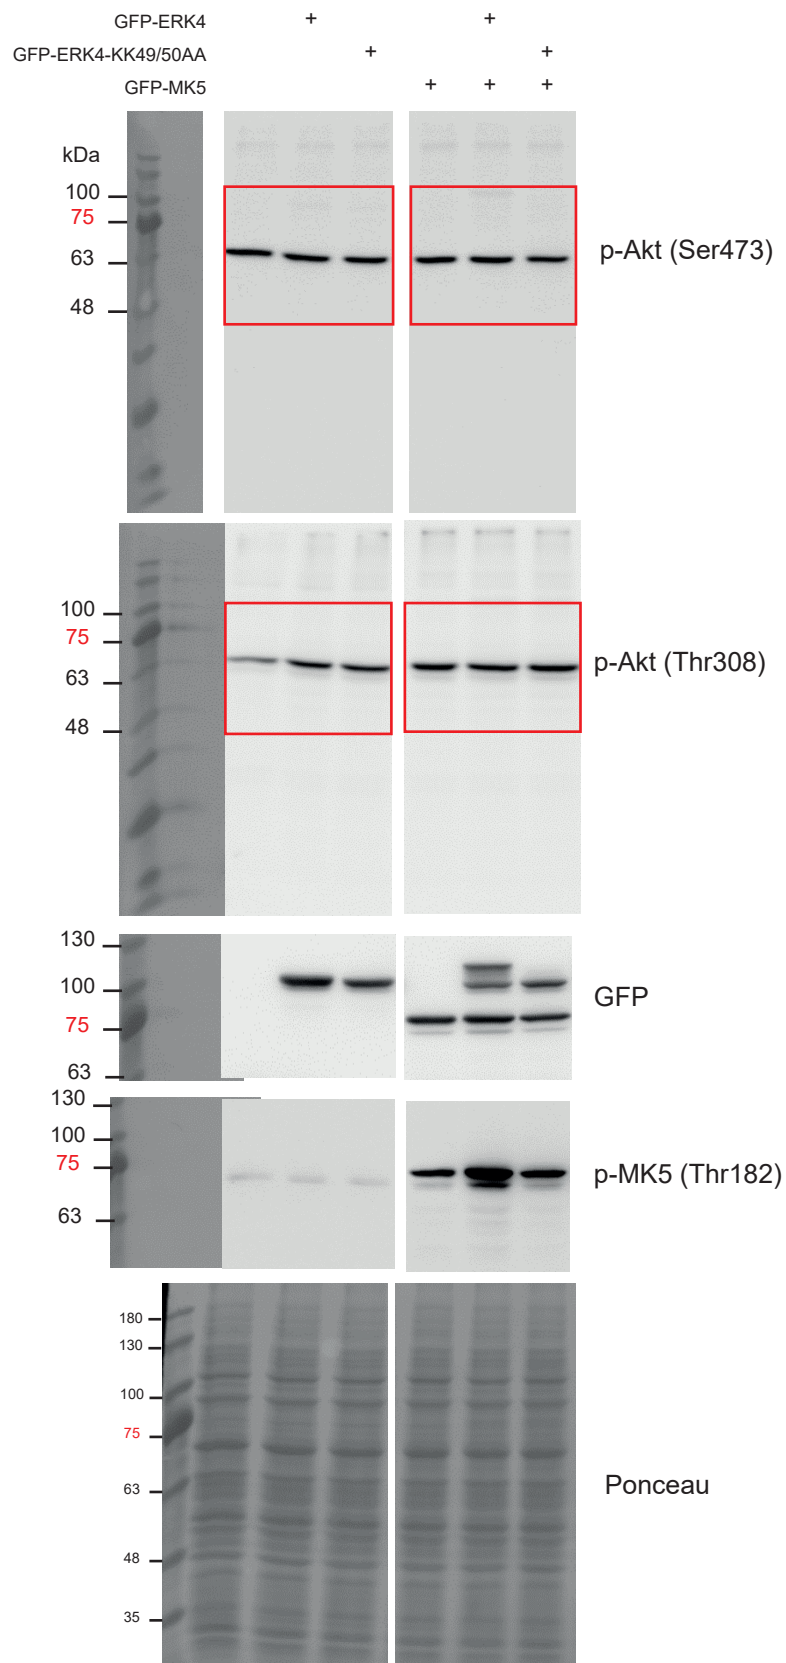

Supplement: s1 [file s1]
